# Supplementary material for: Thick mesostructured films via light induced self-assembly
Source: Royal Society of Chemistry journal article supplement (doi:10.1039/c2ra21676k), 2012-01-01
Supplement: c2ra21676k.pdf [file c2ra21676k.pdf]

## Thick Mesostructured Films *via* Light Induced Self-Assembly

Héloïse De Paz-Simon<sup>a</sup>, Abraham Chemtob<sup>a\*</sup>, Florian Crest<sup>a</sup>, Céline Croutxé-Barghorn<sup>a</sup>, Laure Michelin<sup>b</sup>, Loïc Vidal<sup>b</sup>, Séverinne Rigolet<sup>b</sup>, Bénédicte Lebeau<sup>b</sup>

<sup>a</sup>Laboratory of Macromolecular Photochemistry and Engineering, University of Haute-Alsace, ENSCMu, 3, rue Alfred Werner, 68093 Mulhouse Cedex, France

<sup>b</sup>Institute of Mulhouse Material Science, CNRS, LRC 7228, University of Haute-Alsace, 3 rue Alfred Werner 68093 Mulhouse Cedex, France

### ELECTRONIC SUPPORTING INFORMATION

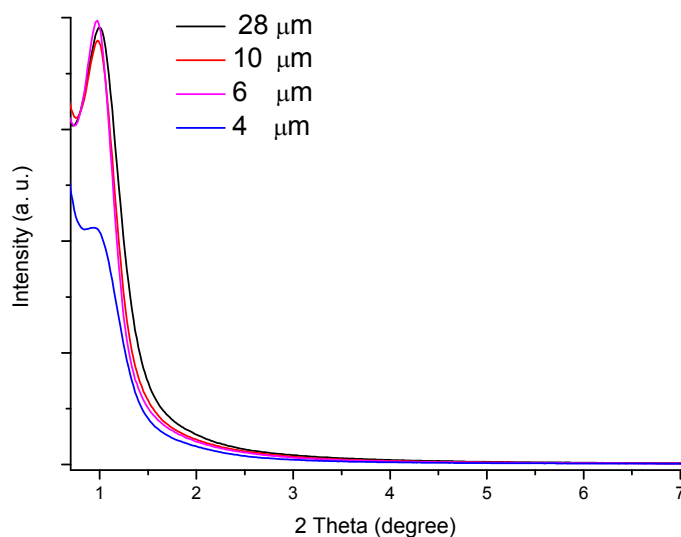

**Figure S1.** XRD patterns obtained for calcined sample of P123/PDMOS = 0.75 of various initial film thickness: (—) 4 μm, (—) 6 μm, (—) 10 μm and (—) 28 μm
